# Supplementary material
Source: PubMed Central journal article supplement (PMC5056081)
Supplement: pnas.1611477113.sapp.pdf [file pnas.1611477113.sapp.pdf]

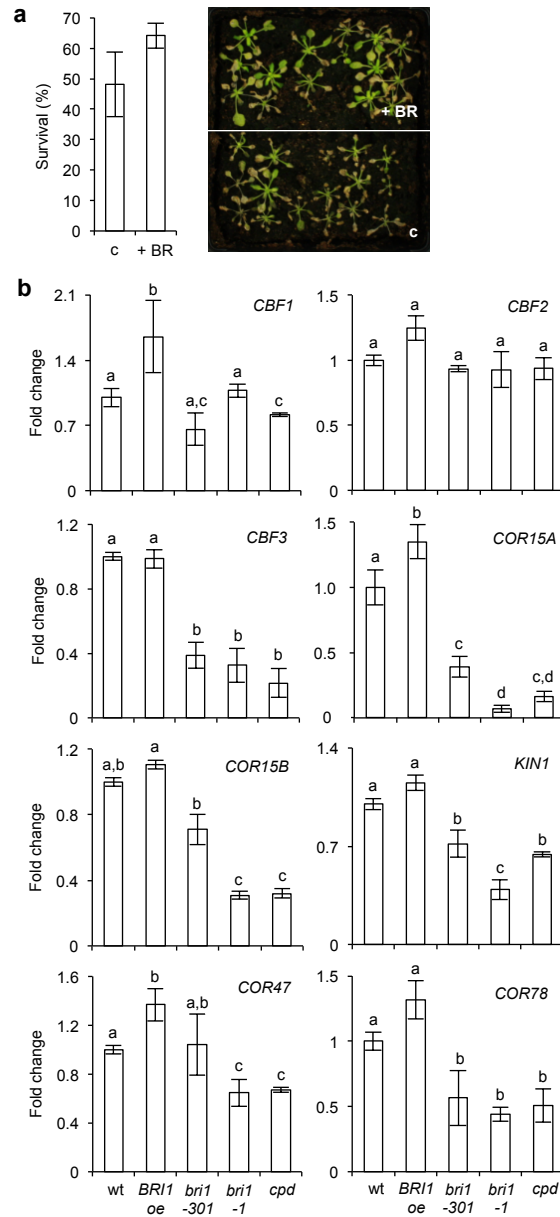

**Figure S1. Basal freezing tolerance and basal levels of COR genes are altered by BRs.** (a) Three-week-old, soil-grown Arabidopsis plants were sprayed twice a day for 2 days either with 10  $\mu$ M of epi-BL (BR) or with DMSO as a control (c), and a freezing tolerance assay was performed. Quantification (left) and representative plants (right) are shown. (b) Transcript levels of CBFs and downstream COR genes were determined by qPCR in 12-day-old seedlings of the wild type, *35S:BRI1-GFP (BRI1oe)*, *bri1-301*, *bri1-1* and *cpd*. The error bars show SDs of at least 3 biological replicates. The letters indicate significant differences ( $P < 0.05$ ; ANOVA).

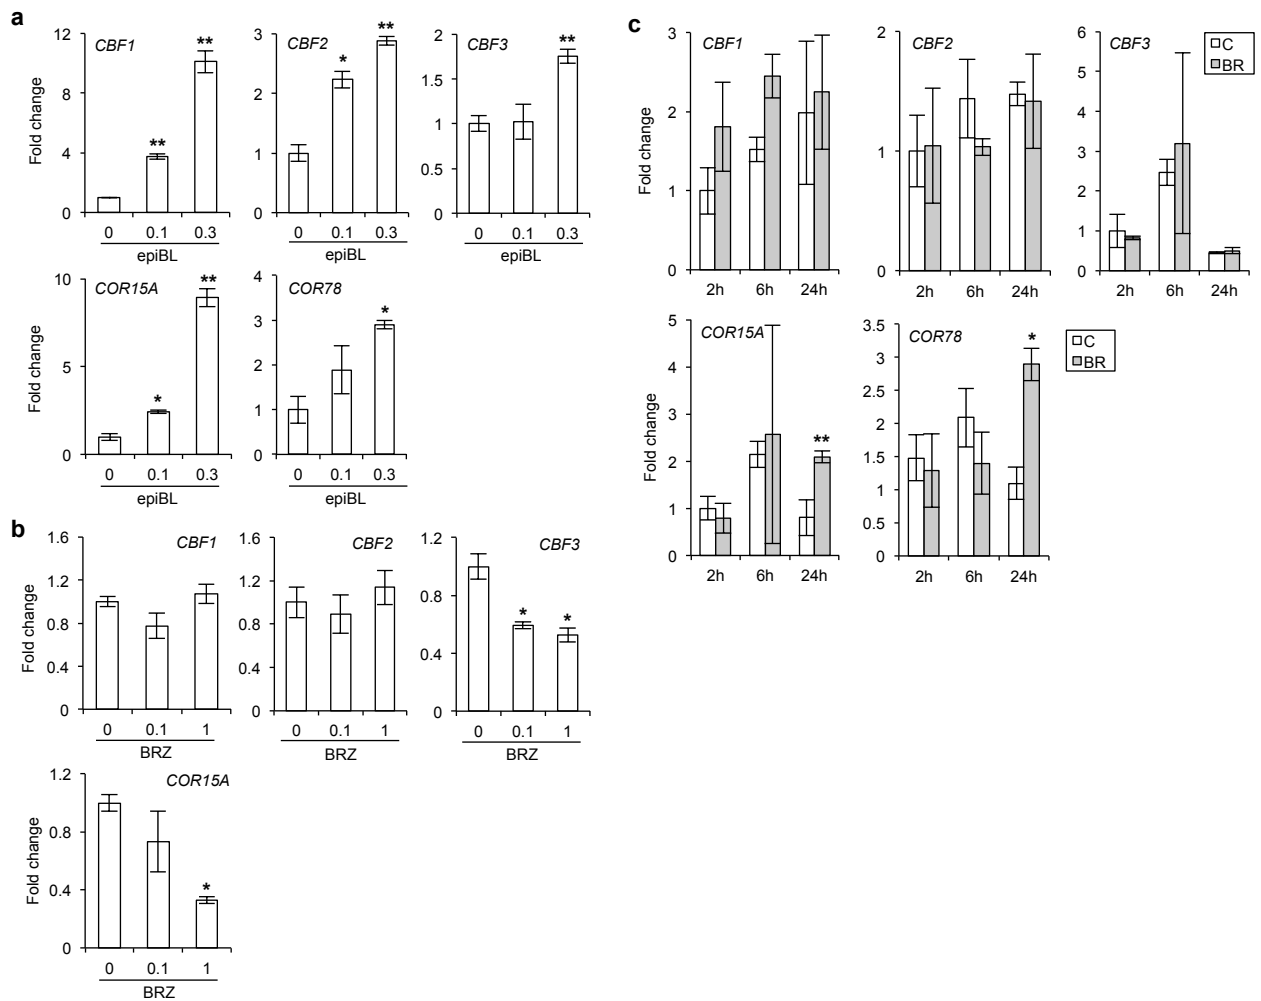

**Figure S2. Application of BR promotes COR gene expression in arabidopsis.** (a, b) Transcript levels of *CBFs* and *COR* genes were determined by qPCR in 10-day-old wild-type arabidopsis seedlings grown on ½ MS media supplemented with different concentrations (in μM) of epi-BL (b) or Brz (c). Error bars show SDs of 2 biological replicates. Asterisks indicate significant differences (\*  $P < 0.05$ , \*\*  $P < 0.01$ ; Student's t-test). (c) Effect of short-term epiBL treatments on the expression of *CBFs* and *COR* genes. Three-week-old, soil-grown wild-type plants were sprayed with either 10 μM of epiBL (BR) or DMSO as a control (c), and qPCRs were performed from plant material collected 2, 6 or 24 h after the treatment. Error bars show SDs of 2 biological replicates. Asterisks indicate significant differences (\*  $P < 0.05$ , \*\*  $P < 0.01$ ; Student's t-test).

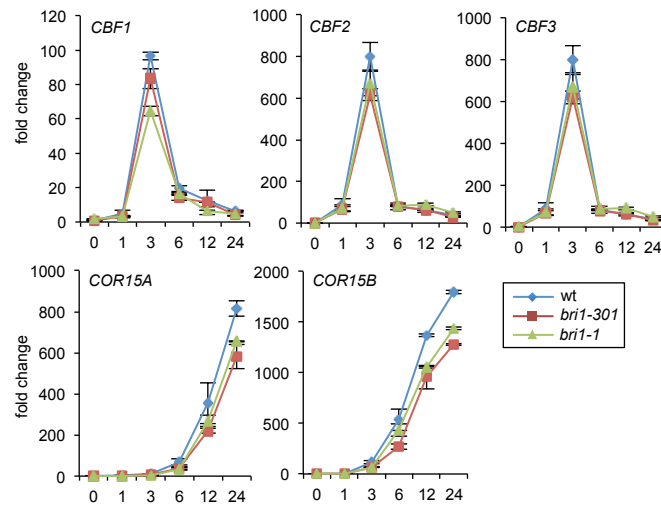

**Figure S3. CBF and COR gene expression levels in BR signaling mutants following cold treatment.** Transcript levels of CBF and COR genes in wild-type, *bri1-301* and *bri1-1* plants treated at 4 °C for the indicated periods of time (in hrs). Plants were grown on ½ MS plates in LDs at 21°C for 12 days and transferred to 4 °C. Samples were collected at the given time points, and mRNA levels were determined by qPCR. Error bars represent the SDs of typically 2 biological replicates.

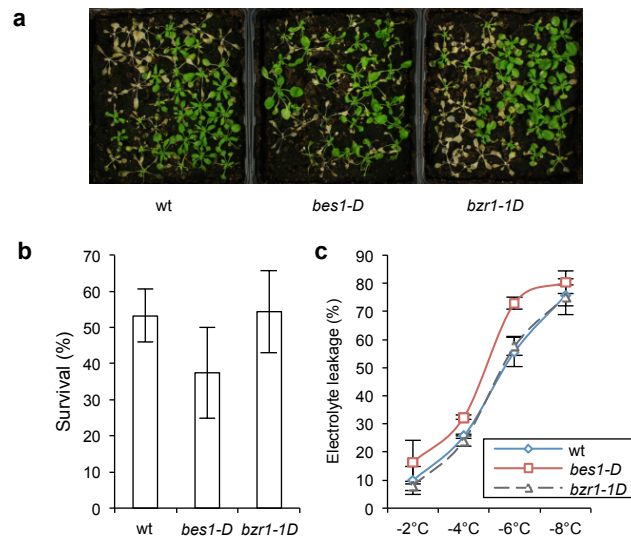

**Figure S4. Freezing stress responses of *bzt1-1D* and *bes1-D*.** (a,b) Freezing tolerance of non-acclimated *bzt1-1D* and *bes1-D* lines compared to that of the wild type. Plants were grown in soil under LD growth conditions at 21 °C. After 3 weeks, they were treated at -6 °C for 4 h. Survival was assessed after 2 weeks of recovery at 21 °C. (b) shows representative plants of each line, and (c) is the quantification of the results. Error bars show SDs of 3 biological replicates. (c) Electrolyte leakage in leaves of non-acclimated plants of wild-type, *bzt1-1D* and *bes1-D* plants grown under the same conditions as described in b and treated at the indicated temperatures. Error bars show SDs of 3 biological replicates.

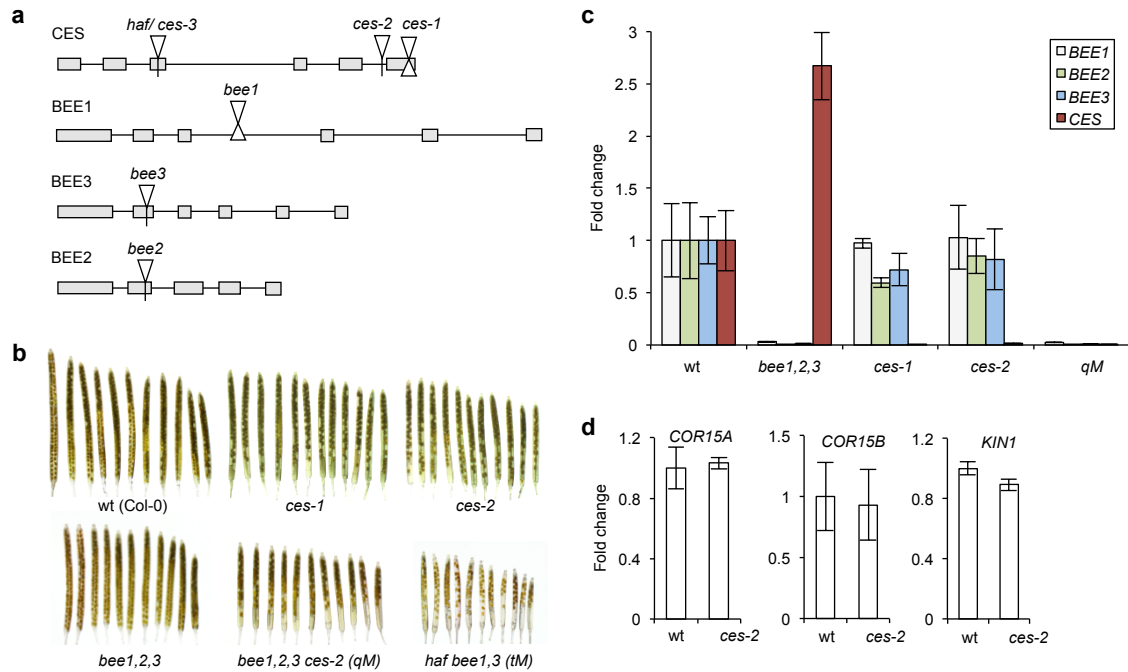

**Figure S5. Generation and analysis of a *ces-2 bee1 bee2 bee3* quadruple mutant (*qM*).** (a) Illustration of *CES*, *BEE1*, *BEE2* and *BEE3* gene organisation. Position of T-DNA insertions are indicated with triangles: *ces-1*: after bp 1475 in exon 6; *ces-2*: after bp 1380 in intron 5; *haf/ces-3*: in exon 3<sup>22</sup>; *bee1*: after bp 863 with a deletion of 105 bp ( $\Delta$ 864-967) in intron 3; *bee2*: after bp 519 with a duplication of 7 bp (AGGTGAA) in exon 2; and *bee3*: after bp 554 with a deletion of 4 bp ( $\Delta$ 555-558) in exon 2. (b) Silique-filling phenotype of siliques harvested from a single branch of 8-week-old plants. (c) Transcript levels of *BEE1*, *BEE2*, *BEE3* and *CES* in the different mutant lines. Floral tissues of 5-week-old plants were used for qPCR. SDs of 3 biological replicates are shown. (d) Transcript levels of *COR15A*, *COR15B* and *KIN1* in non-acclimated 12-day-old seedlings of *ces-2* mutant plants compared to those of the wild type. SDs of 3 biological replicates are shown.

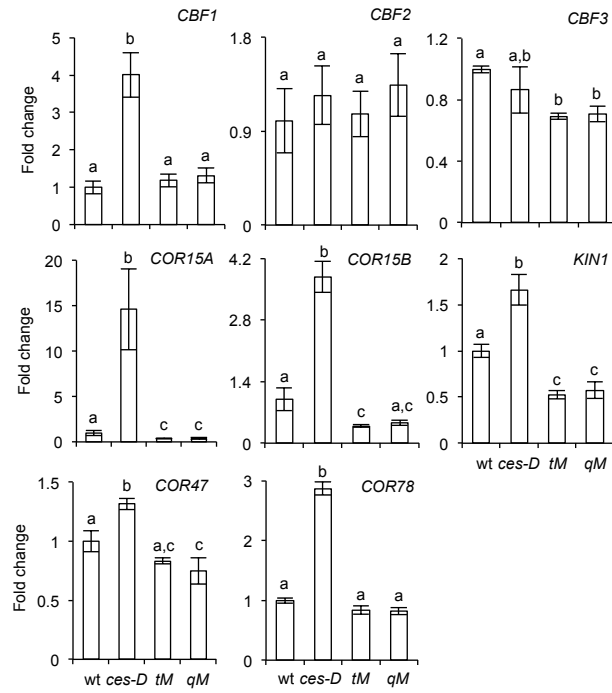

**Figure S6. CES promotes COR gene expression.** mRNA levels of CBF and COR genes were determined by qPCR in 12-day-old, non-acclimated *ces-D*, *tM* and *qM* plants grown on  $\frac{1}{2}$  MS medium. Error bars are SDs of 3 biological replicates. The letters indicate significant differences between genotypes ( $P < 0.05$ ; ANOVA).

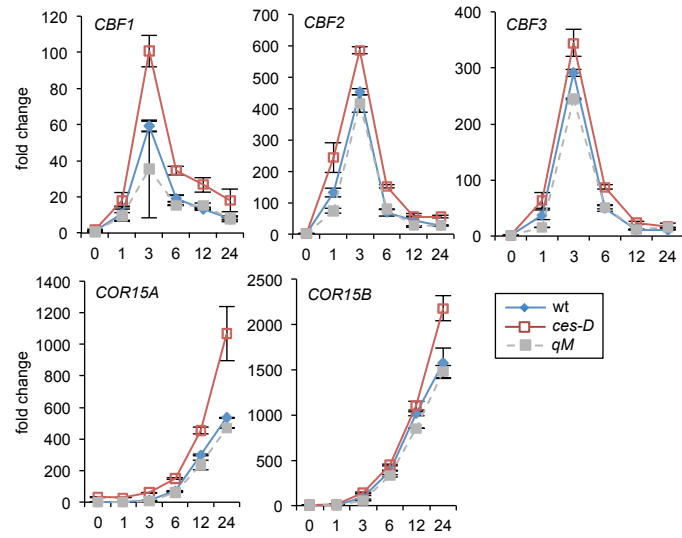

**Figure S7. Transcript levels of *CBF* and *COR* genes in *ces* mutant plants following cold treatment.** 12-day-old plants of wild-type, *ces-D* and *qM* plants treated at 4 °C for the indicated periods of time (in hrs). Error bars are SDs of typically 2 biological replicates.

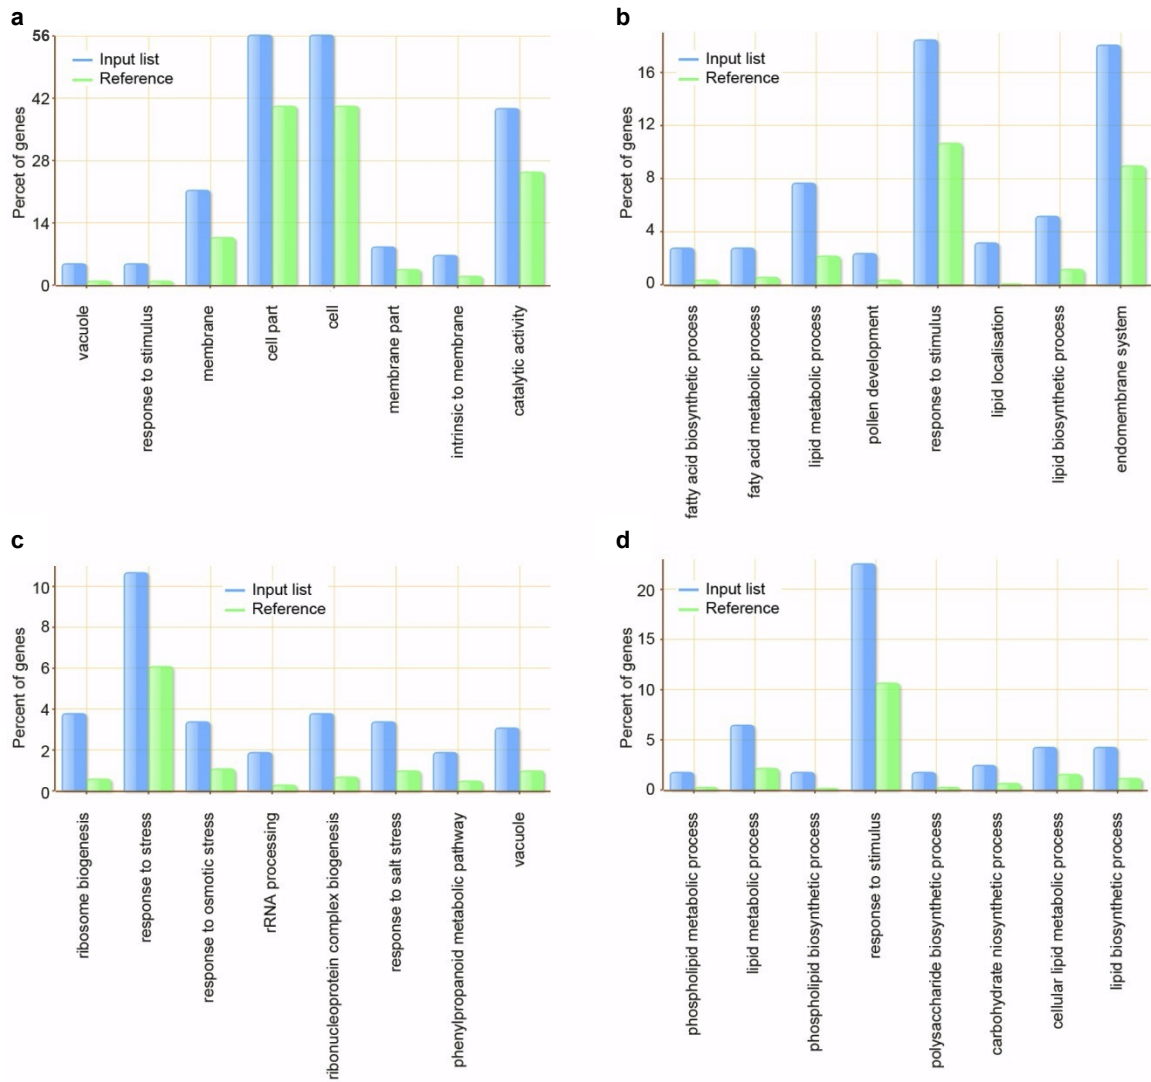

**Figure S8. Enriched GO terms in *ces-D*.** (a,b) GO terms enriched among CBF-independent, cold-induced genes up- (a) or down-regulated (b) in *ces-D* at 21 °C. (c,d) GO terms enriched among CBF-independent, cold-induced genes up- (c) or down-regulated (d) in *ces-D* at 4 °C. For full data sets see Tables S7 and S8.



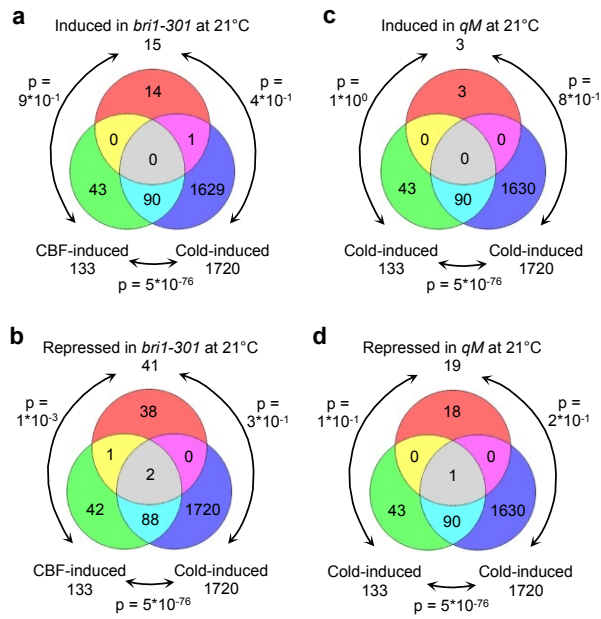

**Figure S9. Whole transcriptome changes in *bri1-301* and *qM* as compared to wild type at 21 °C.** (a) Overlap of genes induced in *bri1-301* as compared to wild type at 21°C, cold-induced and CBF-induced genes. (b) Same as (a) but for the *qM*. (c,d) Overlap of genes repressed in *bri1-301* (c) or *qM* (d) as compared to wild type at 21 °C, cold-induced and CBF-induced genes. p-values were calculated with the hypergeometric test.

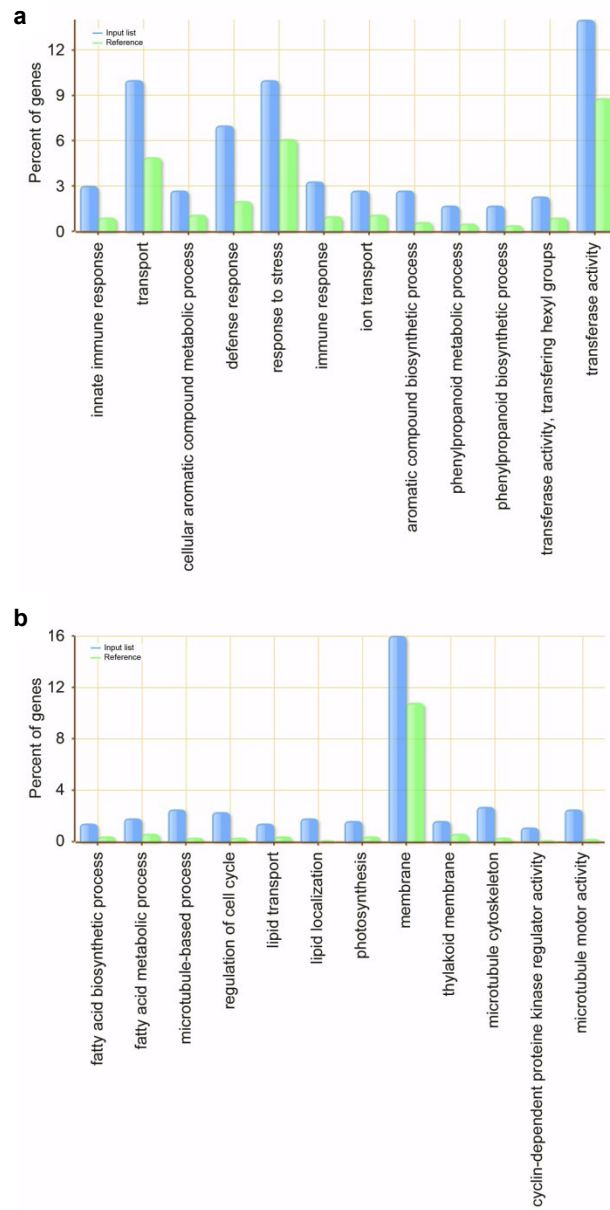

**Figure S10. Enrichment of GO terms.** (a) Enrichment of GO terms in the overlap of cold-induced genes that are not cold-induced in *bri1-301* and in *qM* at 4 °C. (b) Enrichment of GO terms in the overlap of cold-repressed genes that are not cold-repressed in *bri1-301* and in *qM* at 4 °C. For complete data see Tables S13 and S14.

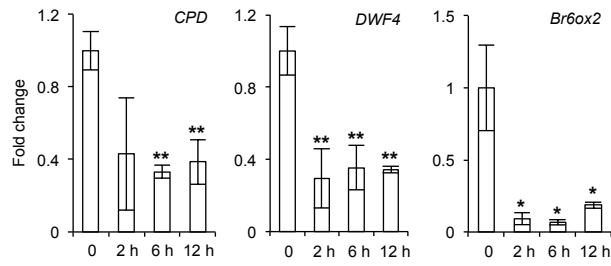

**Figure S11. Impact of cold stress on the expression of BR biosynthetic genes.** Transcript levels of *CPD*, *DWF4* and *Br6ox2* were determined in 3-week-old, soil-grown wild-type plants treated at 4°C for the indicated amounts of time by qPCR. Error bars show SDs of 3 biological replicates. Asterisks indicate significant differences (\*  $P < 0.05$ , \*\*  $P < 0.01$ ; Student's t-test).

**Supplementary Table 1. List of genes present in the overlap of cold-induced genes and genes repressed in det2-1 shown in Figure 1a. CBF-induced and not CBF-induced genes are listed separately.**

| <b>gene</b>            | <b>symbol</b> | <b>full_name</b>                                                |
|------------------------|---------------|-----------------------------------------------------------------|
| <b>CBF regulon</b>     |               |                                                                 |
| AT5G15970              | KIN2          |                                                                 |
| AT1G29395              | COR413        | COLD REGULATED 413                                              |
| AT3G50970              | LTI30         | LOW TEMPERATURE-INDUCED 30                                      |
| AT4G30650              | NA            | NA                                                              |
| AT1G20450              | ERD10         | EARLY RESPONSIVE TO DEHYDRATION 10                              |
| AT4G27560              | NA            | NA                                                              |
| AT5G23220              | NIC3          | nicotinamidase 3                                                |
| AT1G62570              | FMO GS-OX4    | FLAVIN-MONOOXYGENASE GLUCOSINOLATE S-OXYGENASE 4                |
| AT5G24570              | NA            | NA                                                              |
| AT1G20440              | COR47         | COLD-REGULATED 47                                               |
| AT3G22840              | ELIP          | EARLY LIGHT-INDUCIBLE PROTEIN                                   |
| AT3G09540              | NA            | NA                                                              |
| AT5G27930              | NA            | NA                                                              |
| AT2G02120              | LCR70         | LOW-MOLECULAR-WEIGHT CYSTEINE-RICH 70                           |
| AT5G48880              | KAT5          | 3-KETO-ACYL-COENZYME A THIOLASE 5                               |
| AT2G17840              | ERD7          | EARLY-RESPONSIVE TO DEHYDRATION 7                               |
| AT4G19810              | CHIC          | CLASS V CHITINASE                                               |
| AT3G12320              | LNK3          | NIGHT LIGHT-INDUCIBLE AND CLOCK-REGULATED 3                     |
| AT1G04240              | IAA3          | INDOLE-3-ACETIC ACID INDUCIBLE 3                                |
| AT5G55180              | NA            | NA                                                              |
| <b>Not CBF regulon</b> |               |                                                                 |
| AT1G62710              | BETA-VPE      | beta vacuolar processing enzyme                                 |
| AT1G22770              | GI            | GIGANTEA                                                        |
| AT4G10960              | UGE5          | UDP-D-glucose/UDP-D-galactose 4-epimerase 5                     |
| AT5G53970              | TAT7          | TYROSINE AMINOTRANSFERASE 7                                     |
| AT5G62210              | ATS3          | Embryo-specific protein 3                                       |
| AT4G22870              | NA            | NA                                                              |
| AT1G70900              | NA            | NA                                                              |
| AT2G21320              | BBX18         | B-box domain protein 18                                         |
| AT3G51660              | NA            | NA                                                              |
| AT3G27210              | NA            | NA                                                              |
| AT1G19200              | NA            | NA                                                              |
| AT5G43150              | NA            | NA                                                              |
| AT3G49220              | NA            | NA                                                              |
| AT5G50100              | NA            | NA                                                              |
| AT4G25640              | ATDTX35       | DETOXIFYING EFFLUX CARRIER 35                                   |
| AT5G19410              | ABCG23        | ATP-BINDING CASSETTE G23                                        |
| AT2G43018              | CPuORF17      | CONSERVED PEPTIDE UPSTREAM OPEN READING FRAME 17                |
| AT5G44670              | GALS2         | GALACTAN SYNTHASE 2                                             |
| AT4G00080              | UNE11         | UNFERTILIZED EMBRYO SAC 11                                      |
| AT1G17745              | PGDH          | 3-PHOSPHOGLYCERATE DEHYDROGENASE                                |
| AT5G14640              | ATSK13        | SHAGGY-LIKE KINASE 13                                           |
| AT5G50840              | NA            | NA                                                              |
| AT3G12700              | NANA          | NANA                                                            |
| AT5G53120              | ATSPDS3       | SPERMIDINE SYNTHASE 3                                           |
| AT1G73390              | NA            | NA                                                              |
| AT1G12845              | NA            | NA                                                              |
| AT1G12370              | PHR1          | PHOTOLYASE 1                                                    |
| AT5G35970              | NA            | NA                                                              |
| AT1G65060              | 4CL3          | 4-COUMARATE:COA LIGASE 3                                        |
| AT2G39130              | NA            | NA                                                              |
| AT3G44450              | NA            | NA                                                              |
| AT2G39450              | ATMTP11       | MANGANESE TRANSPORTER 11                                        |
| AT1G78340              | ATGSTU22      | GLUTATHIONE S-TRANSFERASE TAU 22                                |
| AT5G40480              | EMB3012       | EMBRYO DEFECTIVE 3012                                           |
| AT1G08650              | ATPPCK1       | PHOSPHOENOLPYRUVATE CARBOXYLASE KINASE 1                        |
| AT3G57780              | NA            | NA                                                              |
| AT3G05800              | AIF1          | ATBS1(ACTIVATION-TAGGED BRI1 SUPPRESSOR 1)-INTERACTING FACTOR 1 |
| AT2G47000              | ABCB4         | ATP-BINDING CASSETTE B4                                         |

|           |          |                                                        |
|-----------|----------|--------------------------------------------------------|
| AT1G78050 | PGM      | PHOSPHOGLYCERATE/BISPHOSPHOGLYCERATE MUTASE            |
| AT2G19580 | TET2     | TETRASPANIN2                                           |
| AT1G56300 | NA       | NA                                                     |
| AT5G42720 | NA       | NA                                                     |
| AT2G29650 | ANTR1    | ANION TRANSPORTER 1                                    |
| AT1G16300 | GAPCP-2  | GLYCERALDEHYDE-3-PHOSPHATE DEHYDROGENASE OF PLASTID 2  |
| AT5G36220 | CYP81D1  | CYTOCHROME P450 81D1                                   |
| AT2G22510 | NA       | NA                                                     |
| AT1G08430 | ALMT1    | ALUMINUM-ACTIVATED MALATE TRANSPORTER 1                |
| AT3G17998 | CPuORF30 | CONSERVED PEPTIDE UPSTREAM OPEN READING FRAME 30       |
| AT5G27990 | TSR2     | Pre-rRNA-processing protein TSR2                       |
| AT3G54140 | ATPTR1   | ARABIDOPSIS THALIANA PEPTIDE TRANSPORTER 1             |
| AT3G53620 | AtPPa4   | PYROPHOSPHORYLASE 4                                    |
| AT4G34980 | SLP2     | SUBTILISIN-LIKE SERINE PROTEASE 2                      |
| AT5G39710 | EMB2745  | EMBRYO DEFECTIVE 2745                                  |
| AT1G44800 | SIAR1    | SILIKES ARE RED 1                                      |
| AT1G07180 | ATND11   | INTERNAL NON-PHOSPHORYLATING NAD ( P ) H DEHYDROGENASE |
| AT1G58270 | ZW9      |                                                        |
| AT3G53260 | ATPAL2   | PHENYLALANINE AMMONIA-LYASE 2                          |
| AT1G13930 | NA       | NA                                                     |
| AT1G43620 | UGT80B1  | UDP GLYCOSYLTRANSFERASE 80B1                           |
| AT4G02410 | ATLPK1   | L-TYPE LECTIN RECEPTOR KINASE IV.3                     |

---

**Supplementary Table 2. List of genes present in the overlap of cold-induced genes and genes induced in ces-D shown in Figure 3a. CBF-induced and not CBF-induced genes are listed separately.**

| <b>gene</b>            | <b>symbol</b> | <b>full_name</b>                                 |
|------------------------|---------------|--------------------------------------------------|
| <b>CBF regulon</b>     |               |                                                  |
| AT2G42540              | COR15A        | COLD REGULATED 15A                               |
| AT2G42530              | COR15B        | COLD REGULATED 15B                               |
| AT5G52310              | COR78         | COLD REGULATED 78                                |
| AT5G15960              | KIN1          |                                                  |
| AT1G29395              | COR413-TM1    | COLD REGULATED 413 THYLAKOID MEMBRANE 1          |
| AT1G51090              | NA            | NA                                               |
| AT4G12000              | NA            | NA                                               |
| AT1G58360              | AAP1          | AMINO ACID PERMEASE 1                            |
| AT4G18270              | ATTRANS11     | ARABIDOPSIS THALIANA TRANSLOCASE 11              |
| AT5G64260              | EXL2          | EXORDIUM like 2                                  |
| <b>Not CBF regulon</b> |               |                                                  |
| AT2G28400              | NA            | NA                                               |
| AT4G18280              | NA            | NA                                               |
| AT2G32190              | NA            | NA                                               |
| AT4G31800              | ATWRKY18      | ARABIDOPSIS THALIANA WRKY DNA-BINDING PROTEIN 18 |
| AT4G38400              | AEXLA2        | EXPANSIN-LIKE A2                                 |
| AT2G21590              | APL4          |                                                  |
| AT5G62360              | NA            | NA                                               |
| AT4G23600              | COR13         | CORONATINE INDUCED 1                             |
| AT3G11420              | NA            | NA                                               |
| AT4G33550              | NA            | NA                                               |
| AT3G11410              | PP2CA         | PROTEIN PHOSPHATASE 2C                           |
| AT5G58670              | ATPLC         | ARABIDOPSIS THALIANA PHOSPHOLIPASE C             |
| AT2G33590              | AtCRL1        |                                                  |
| AT4G33950              | ATOST1        | OPEN STOMATA 1                                   |
| AT5G18130              | NA            | NA                                               |
| AT3G05400              | NA            | NA                                               |
| AT1G18710              | AtMYB47       | MYB DOMAIN PROTEIN 47                            |

**Supplementary Table 15. Primers used in this study.**

| <b>Name</b>     | <b>Sequence</b>                          |    |
|-----------------|------------------------------------------|----|
| COR15A-pPCR-FW  | 5' ACCTCAACGAGGCCACAAAGAAAAG             | 3' |
| COR15A-pPCR-RV  | 5' CGCTTTCTCACCATCTGCTAATGC              | 3' |
| COR15B-pPCR-FW  | 5' CCTCAACGAAGCCACAAAGAA                 | 3' |
| COR15B-pPCR-RV  | 5' TTCCTCAGTCGCAGTTTCATT                 | 3' |
| KIN-pPCR-FW     | 5' AAGAATGCCTTCCAAGCCGGTCAG              | 3' |
| KIN-pPCR-RV     | 5' TACACTCTTCCCGCCTGTTGTGC               | 3' |
| COR47-pPCR-FW   | 5' TCCCAGGACACCACGACAA                   | 3' |
| COR47-pPCR-RV   | 5' AATCCTCTGCTTTCTCGTCGT                 | 3' |
| COR78-pPCR-FW   | 5' GACGAAGTTACCTATCTCCG                  | 3' |
| COR78-pPCR-RV   | 5' CTTCTTTGTCGTCGTTTCC                   | 3' |
| CBF-pPCR-FW     | 5' TTCGCTGACTCGGCTTGG                    | 3' |
| CBF1-pPCR-RV    | 5' CATGATTCTGGTTCGTCGT                   | 3' |
| CBF2-pPCR-RV    | 5' TCAAACATCGCCTCATCGTG                  | 3' |
| CBF3-pPCR-RV    | 5' GACACATCTCATCTTGAAAATT                | 3' |
| UBC-FW          | 5' TCAAATGGACCGCTCTTATC                  | 3' |
| UBC-RV          | 5' CACAGACTGAAGCGTCCAAG                  | 3' |
| CBF1-ChIP-FW    | 5' ACACACGTCAGACAGCGAGT                  | 3' |
| CBF1-ChIP-RV    | 5' CGGAGGAGAGATAACGGATATG                | 3' |
| CBF2-ChIP-FW    | 5' CAGTGATTGACAGCCTTGATA                 | 3' |
| CBF2-ChIP-RV    | 5' ATTTGGATATTTGTGGGGTTCG                | 3' |
| CBF3-ChIP-FW    | 5' CCATTGTCCATACCTTCTCT                  | 3' |
| CBF3-ChIP-RV    | 5' AAAGAGTGGGTATGGTCAAGA                 | 3' |
| CBF1-luc-FW     | 5' GATTGCTTCTCGAGGTAATA                  | 3' |
| CBF1-luc-RV     | 5' TTGGCGTCTTCCATGGATCAGAGTACTCTG        | 3' |
| CBF1-luc-FW1    | 5' TTGCTTCTCGAGGTAATAAAAAAGTCATTCACA     | 3' |
| CES KO fwd      | 5' GGCCATTGATTTCACTCTTCA                 | 3' |
| CES KO rev      | 5' ACTGACGTCACACACAAAAGA                 | 3' |
| BEE1 KO fwd     | 5' AACAACTTCACTTTCCCGG                   | 3' |
| BEE1 KO rev     | 5' TTGATTCTGTAGAGACTGGACATAAT            | 3' |
| BEE2 KO fwd     | 5' GAAGATCAAAGCAGAGGATGAA                | 3' |
| BEE2 KO rev     | 5' TTCACCTGTTTTGCGGATAA                  | 3' |
| BEE3 KO fwd     | 5' ACCTCTTCTGCTCAAGTTTCCA                | 3' |
| BEE3 KO rev     | 5' CGAACTTGCTGCTGTAAGCTT                 | 3' |
| LBb1            | 5' GCGTGGACCGCTTGCTGCAACT                | 3' |
| CBF1 fwd comp   | 5' TCGCTATGTAATAACACGTGTCATTCACAGAGACA   | 3' |
| CBF1 rev comp   | 5' TGTCTCTGTGAATGACACGTGTATAGTACATAGCGA  | 3' |
| CBF1mt fwd comp | 5' TCGCTATGTAATAAAAAAATCATTACAGAGACA     | 3' |
| CBF1mt rev comp | 5' TGTCTCTGTGAATGATTTTTTTTATAGTACATAGCGA | 3' |
| CBF2 fwd comp   | 5' TAGCTGTTTCTTATCCACGTGGCATTACAGAGACA   | 3' |
| CBF2 rev comp   | 5' TGTCTCTGTGAATGCCACGTGGATAAGAAACAGCTA  | 3' |
| CBF2mt fwd comp | 5' TAGCTGTTTCTTATCAAAAAAGCATTACAGAGACA   | 3' |
| CBF2mt rev comp | 5' TGTCTCTGTGAATGCTTTTTTTGATAAGAAACAGCTA | 3' |
| CBF3 fwd comp   | 5' TGTGGAGTCTCGTACCACGTGTCGCGTCACTTCACT  | 3' |
| CBF3 rev comp   | 5' AGTGAAGTGACGCGACACGTGGTACGAGACTCCACA  | 3' |
| CBF3mt fwd comp | 5' TGTGGAGTCTCGTACAAAAAATCGCGTCACTTCACT  | 3' |
| CBF3mt rev comp | 5' AGTGAAGTGACGCGATTTTTTTGTACGAGACTCCACA | 3' |
| CPD-1           | 5' CTTGCTCAACTCAAGGAAGAG                 | 3' |
| CPD-2           | 5' CTCGTAGCGTCTCATTAAACCAC               | 3' |
| DWF4-3          | 5' CCGTTGAAGAGCTTAGGGAAGAG               | 3' |
| DWF4-4          | 5' CATTTCCCAATCGAAGAGTTTC                | 3' |
| BR6ox2-1        | 5' AGCTTGTTGTGGGAAGTCTATCGG              | 3' |
| BR6ox2-2        | 5' CGATGTTGTTTCTTGCTTGGACTC              | 3' |
